1 Fine-scale family structure shapes influenza transmission risk in households: insights  
2 from a study of primary school students in Matsumoto city, 2014/15.

3

4 Akira Endo<sup>1\*</sup>, Mitsuo Uchida<sup>2</sup>, Adam J. Kucharski<sup>1,3</sup>, Sebastian Funk<sup>1,3</sup>

5 <sup>1</sup> Department of Infectious Disease Epidemiology, London School of Hygiene &  
6 Tropical Medicine, London, United Kingdom

7 <sup>2</sup> Department of Public Health, Graduate School of Medicine, Gunma University

8 <sup>3</sup> Centre for the Mathematical Modelling of Infectious Diseases, London School of  
9 Hygiene and Tropical Medicine, London, United Kingdom

10

11 Abstract

12 **Background:** Households are important settings for the transmission of seasonal  
13 influenza. Previous studies found that the per-person risk of within-household  
14 transmission decreases with household size. However, more detailed heterogeneities  
15 driven by household composition and contact patterns have not been studied.

16 **Methods:** We employed a mathematical model which accounts for infections both from  
17 outside and within the household. The model was applied to citywide primary school

---

\* Correspondence to: [akira.endo@lshtm.ac.uk](mailto:akira.endo@lshtm.ac.uk)  
Keppel St., Bloomsbury, London, WC1E 7HT, UK.

18 surveillance data of seasonal influenza in 2014/15 season in Matsumoto city, Japan. We

19 compared a range of models to estimate the structure of household transmission.

20 **Results:** Familial relationship and household composition strongly influenced the

21 transmission patterns of seasonal influenza in households. Children had substantially

22 high risk of infection from outside the household (up to 20%) compared with adults (1-

23 3%). Intense transmission was observed within-generation (between

24 children/parents/grandparents) and also between mother and child, with transmission

25 risks typically ranging around 5-20% depending on the pair and household composition.

26 **Conclusions:** We characterised heterogeneity in household transmission patterns of

27 influenza. Children were identified as the largest source of secondary transmission, with

28 family structure influencing infection risk. This suggests that vaccinating children

29 would have stronger secondary effects on transmission than would be assumed without

30 taking into account transmission patterns within the household.

31

32 Abbreviations: CPI, community probability of infection; RDK, rapid diagnostic kit;

33 SITP, susceptible-infectious transmission probability; MCMC, Markov-chain Monte

34 Carlo; WBIC, widely-applicable Bayesian information criterion; CrI, credible interval.

35

## 36 **Introduction**

37           Respiratory infectious diseases transmitted by droplets, exemplified by  
38 influenza, are known to spread over social contact networks (1,2). Social settings which  
39 involve frequent contacts play important roles in the transmission dynamics (3,4).  
40 Households are considered as one of the main layers of transmission, as individuals  
41 come in close contact with each other both conversationally and physically on a daily  
42 basis (5–7). Many epidemiological studies have used household data to investigate the  
43 transmission dynamics of influenza within households (8,9), particularly in terms of the  
44 secondary attack rate (the number of household secondary cases divided by the number  
45 of household members at risk). However, this assumes that an index case (the first case  
46 in a household, who is considered to be infected outside the household) is responsible  
47 for all subsequent household cases, and that all the other household members are  
48 equally at the risk of secondary infection.

49           The possibility of co-primary infections and tertiary transmissions are  
50 neglected under such assumptions (8); potentially heterogeneous transmission patterns  
51 between household members are also radically simplified. The former limitation can be  
52 addressed by mathematical models which separately estimate the risk of infection from  
53 outside the household (community probability of infection; CPI) and the within-

54 household transmission risk (10). Many household studies have employed the Longini-  
55 Koopman model and other related models to study within-household transmission  
56 dynamics of influenza (11–17).

57           On the other hand, potentially-heterogeneous transmission patterns have not  
58 been fully studied with empirical data. Multiple household modelling studies  
59 incorporated factors including age, vaccination status and antibody titres (14,16,18–20)  
60 to account for heterogeneity, but these are merely individual risk factors that determine  
61 relative susceptibility of individuals. Considering typical behaviours within the family,  
62 it is natural to expect rich heterogeneity in household contact patterns related to familial  
63 relationships and household compositions, on top of those individual factors (6).  
64 However, to our best knowledge, household size is the only covariate which has been  
65 used to characterise contact behaviours in household models (13,14,17,18,21). Besides,  
66 due to the limited sample size of households in these studies, a rationale on the  
67 quantitative effect of household size in transmission has not been established. Familial  
68 roles/relationships have been paid far less attention to in household studies; we found  
69 only one field study on influenza that included familial roles as a covariate, a  
70 descriptive study that did not quantify the risk by familial roles (22).

71           Households serve as important units in intervention policies (23,24). Tailored  
72   quantification of the transmission risks from outside and inside the household will help  
73   prioritising and promoting household-level prevention strategies including vaccination.  
74   If specific compositions of households have a higher risk of outbreak than others,  
75   intervention policies may be optimised by particularly targeting such households.  
76   Moreover, as vaccine uptake is shown to be influenced by perceived risk of infection  
77   and vaccine effectiveness (25,26), identifying the household-specific risk of infection  
78   and the possible reduction by vaccines may support highlight the individual benefit of  
79   vaccination.

80   In the present study, we applied a highly flexible household transmission model that  
81   accounts for heterogeneity to a large dataset to investigate the within-household  
82   transmission dynamics of seasonal influenza. The dataset included more than 10,000  
83   primary school students with the infection status not only of students but also of their  
84   household members, which was expected to provide broader understanding on the  
85   within-household transmission dynamics. Particularly laying our focus on the effect of  
86   familial roles and household compositions, we compared multiple models with different  
87   levels of complexity to find the best model to describe the transmission patterns.

88   **Methods**

## 89 **Data source**

90 We used data from a citywide primary school influenza survey. At the end of  
91 the 2014/15 season (early March), parents of students at all 29 public primary schools in  
92 Matsumoto city, Nagano prefecture, Japan, were asked to respond to a questionnaire  
93 consisting of a variety of questions including whether the students had influenza during  
94 the season, onset date and observed symptoms, vaccination history, family composition  
95 and who in the same household had influenza episodes during the season. The data was  
96 originally collected for an observational study on the effect of prevention measures  
97 against seasonal influenza (Uchida et al., 2017) (27). In the present study, we only  
98 considered data on influenza episodes in students, their household composition and  
99 influenza episodes in the household members. Participants reported the number of  
100 siblings in the household, and also ticked the type of family members (such as “father”,  
101 “younger sister” or “uncle”) with whom they live, as well as whether they acquired  
102 influenza in the 2014/15 season. Among 13,217 students eligible, 11,390 (86%)  
103 responded to the survey. After removing those with missing values, 10,486 surveys  
104 were used in the present study. Characteristics of the population and frequent household  
105 compositions are shown in Tables 1 and 2. Further details of the data collection can be

106 found in the original study (27). The analysis was approved by the ethics committee at  
107 London School of Hygiene & Tropical Medicine (approval number: 2715).

108 In the survey, all students who reported acquiring influenza also reported that  
109 they were diagnosed at a medical institution. For other household members, clinical  
110 diagnosis was not clearly required on the question sheet. In Japan, rapid diagnostic kits  
111 (RDKs) are usually used for suspected patients. International systematic reviews  
112 estimated that the sensitivity and specificity of RDKs are 50-70% and 98-99%,  
113 respectively (28,29). However, the sensitivity for studies conducted in Japan included in  
114 these reviews was relatively high (range: 72.9-96.4%), consistent with other earlier  
115 studies conducted in Japan (30–32). Considering that many Japanese primary schools  
116 encourage students presenting influenza-like symptoms to consult medical institutions  
117 so that they are granted absence, we believe that the reported influenza episodes in the  
118 dataset were sufficiently inclusive for our analysis. We also performed sensitivity  
119 analysis to address possible underreporting in the survey (described later).

120

### 121 **Heterogeneous chain binomial model**

122 We employed the chain-binomial model presented in (33) which allows for  
123 heterogeneous transmission. Let  $N$  be a vector representing the number of family

124 members stratified by individual type (e.g., father, mother, child, etc.) in a household.  
125 The probability that a certain combination of individuals (represented by a vector  $\mathbf{n}$ ) in  
126 the household are infected by the end of the season is given by the following recursive  
127 equations.

$$\begin{aligned}\pi(\mathbf{n}; \mathbf{N}, \boldsymbol{\varepsilon}, H) &= \pi(\mathbf{n}; \mathbf{n}, \boldsymbol{\varepsilon}, H) \prod_k \binom{N_k}{n_k} S_k(\mathbf{n}, \boldsymbol{\varepsilon}, H)^{N_k - n_k}, \\ \pi(\mathbf{n}; \mathbf{n}, \boldsymbol{\varepsilon}, H) &= 1 - \sum_{\mathbf{v} < \mathbf{n}} \pi(\mathbf{v}; \mathbf{n}, \boldsymbol{\varepsilon}, H).\end{aligned}\tag{1}$$

128 where  $N_k$  and  $n_k$  are the  $k$ -th component of  $\mathbf{N}$  and  $\mathbf{n}$ , respectively ( $1 \leq k \leq K$ ). The sum  
129  $\sum_{\mathbf{v} < \mathbf{n}}$  is taken for all vector  $\mathbf{v}$  satisfying  $0 \leq v_k \leq n_k$  ( $\forall k$ ) and  $\mathbf{v} \neq \mathbf{n}$ .  $\boldsymbol{\varepsilon}$  is the risk of  
130 external infection for each type of individual (a heterogeneous version of CPI; we avoid  
131 the term CPI as our model assumes household members experiences infection from  
132 different sources outside the household and not from a single “general community”).  
133 The susceptible-infectious transmission probability (SITP)  $\rho_{kl}$  is the probability of  
134 within-household transmission for a specific infectious-susceptible pair (17) and has  
135 been used to quantify within-household transmission. However, it is more convenient to  
136 use the effective household contact matrix  $H = (\eta_{kl})$  in the model;  $\eta_{kl}$  is defined to  
137 satisfy  $\rho_{kl} = 1 - \exp(-\eta_{kl})$ , and is interpreted as the amount of contact that leads to  
138 within-household transmission (effective contact) from type  $l$  to  $k$ . That is,  $\eta_{kl}$  denotes  
139 the amount of exposure that an individual  $k$  experiences when another individual of type



140  $l$  in the same household is infectious.  $S_k(\mathbf{n}, \boldsymbol{\varepsilon})$ , the probability that a type  $k$  individual  
141 escapes infection from both outside and inside the household, is given as

$$S_k(\mathbf{n}, \boldsymbol{\varepsilon}, H) = (1 - \varepsilon_k) \exp\left(-\sum_l \eta_{kl} n_l\right). \quad (2)$$

142  $(1 - \varepsilon_k)$  is the probability that the individual is not infected outside the household, and  
143  $\exp(-\sum_l \eta_{kl} n_l)$  is the probability that the individual is not infected from any of the  
144 household infectives. When a dataset  $\{\mathbf{N}_i, \mathbf{n}_i\}$  contains the family composition and  
145 infection status in each household  $i$ , the likelihood function is given as

$$L(\boldsymbol{\varepsilon}, H; \{\mathbf{N}_i, \mathbf{n}_i\}) = \prod_i \pi(\mathbf{n}_i; \mathbf{N}_i, \boldsymbol{\varepsilon}, H). \quad (3)$$

146 The likelihood  $\pi(\mathbf{n}_i; \mathbf{N}_i, \boldsymbol{\varepsilon}, H)$  is computed by recursively applying Equation (1) starting  
147 with  $\pi(\mathbf{0}; \mathbf{0}, \boldsymbol{\varepsilon}, H) = 1$ .

148 In the present study, we classified each individual in households as one the  
149 following type: “father”, “mother”, “student”, “sibling”, or “other”. “Students” are  
150 participants of the survey (i.e., students of primary schools in Matsumoto city), and  
151 “siblings” are their elder/younger siblings, who may have also been recruited in the  
152 survey if they are primary school students (however, they are not linked in the data and  
153 thus unidentifiable as participants). The parameters for “students” and “siblings” were  
154 differentiated because “siblings” are not necessarily primary school students, therefore  
155 their characteristics may be different from “student”. “Father” and “mother” were

156 labelled as “single-parent” if they are only one parent in the family; models were  
157 considered in model selection where their parameter values were differentiated from  
158 cohabiting parents (details described in “model selection”). Most individuals classified  
159 as “other” were grandparents (90.1%). Uncles/aunts accounted for 6.7%, and the  
160 remaining 3.2% was “none of the above categories”.

161

## 162 **Transmission risk in households**

163 We modelled the possible heterogeneity in household transmission by  
164 parameterising the effective household contact matrix  $H = (\eta_{kl})$ . Our basic  
165 assumptions are: (i) each pairs of individuals have a specific “intensity of contact”; (ii)  
166 the relative importance of each household contact may be reduced if an individual  
167 experiences a large amount of household contacts in total; (iii) the contact intensity  
168 adjusted by the total amount of contact is proportional to the force of infection. That is,  
169 we modelled  $\eta_{kl}$  as

$$\eta_{kl} = \beta \frac{c_{kl}}{C_k \gamma}. \quad (4)$$

170  $C_k$  represents the total number of household contacts experienced by an individual of  
171 type  $k$ , which we introduced to investigate how  $\eta_{kl}$  differs in households of different

172 sizes and compositions. Noting that the number of individuals in contact is  $N_k - 1$  if

173  $k=l$ , we get

$$C_k = \sum_l c_{kl} (N_l - \delta_{kl}), \quad (5)$$

174 where  $\delta_{kl}$  is the Kronecker delta. The value of the exponent parameter  $\gamma$  determines how

175 strongly  $\eta_{kl}$  is scaled by  $C_k$ , which associates our model with density-dependent vs.

176 frequency-dependent mixing assumptions (34).  $\gamma=0$  corresponds to the density

177 dependent mixing assumption, where the force of infection is proportional to the total

178 number of contacts (weighted by intensity) with infectives, whereas  $\gamma=1$  corresponds to

179 the frequency dependent mixing assumption, where it is the proportion of infectious

180 contacts among total contacts that matters. In addition to  $\gamma=0$  and  $\gamma=1$ ,  $\gamma$  was also

181 allowed to be estimated as a free parameter in the model selection, representing a

182 mixture of density-dependent and frequency-dependent mixing.

183 The contact intensity matrix ( $c_{kl}$ ) is interpreted as the per-individual version of the

184 contact matrix ( $c_{kl} = b_{kl}/N_l$  where  $b_{kl}$  is the contact matrix).  $c_{kl}$  is generally a  $K \times K$

185 matrix and contains too many parameters to estimate. We therefore reduced the number

186 of parameters by categorising contacts into the following 5 pairs first:

$$c_{kl} = \begin{cases} c_{CC} \text{ (Child - Child)} \\ c_{FC} \text{ (Father - Child)} \\ c_{MC} \text{ (Mother - Child)} \\ c_{OC} \text{ (Other - Child)} \\ c_{AA} \text{ (Adult - Adult)} \end{cases} \quad (6)$$

187 Child included both “student” and “sibling”, and adult included “father”, “mother” and  
188 “other”. (In models where “single-parent” is a separate type, another parameter  
189  $c_{SC}$  (Single parent – Child) was added.) The matrix was assumed to be symmetric, i.e.,  
190  $c_{kl} = c_{lk}$ . Since we did not have a measurement for the intensity of household contacts  
191 in our dataset, we used relative values of  $c_{kl}$  in our analysis where  $c_{AA}$  was assumed to  
192 be 1.  $\beta$  is approximately equal to the probability of transmission in a (hypothetical)  
193 household composed of only father and mother (since  $\frac{c_{kl}}{c_k} = 1$  regardless of  $\gamma$ ).

194

## 195 **Statistical analysis and model selection**

196 We sampled parameter values from a posterior distribution yielded from the  
197 likelihood function (3) and priors in Table 3 using the Markov-chain Monte Carlo  
198 (MCMC) method. An optimal variance-covariance matrix for proposal was explored by  
199 Adaptive-Metropolis algorithm and then Random-walk Metropolis algorithm was used  
200 to obtain final samples. All MCMC sampling was performed using the R package  
201 {LaplacesDemon}. The scripts to produce MCMC samples for the main results is  
202 repositied on GitHub ([https://github.com/akira-endo/HHstudy\\_FluMatsumoto2014-15](https://github.com/akira-endo/HHstudy_FluMatsumoto2014-15)).

203 First, we tested various possible combinations of assumptions on the effective  
204 contact matrix and the risk of external infection (shown in Table 3), and compared their

205 goodness of fit by Widely-applicable Bayesian Information Criterion (WBIC) (35).  
206 Model variants included (i) homogeneous or heterogeneous mixing in households ( $c_{kl}$ ),  
207 (ii) uniform or heterogeneous risk of external infection ( $\varepsilon_k$ ), (iii) the value of the  
208 exponent parameter ( $\gamma$ ), and (iv) whether the parameter values for a single parent is  
209 differentiated from those of cohabiting parents. Characteristics of compared models are  
210 documented in the supplementary materials, Section 1. WBIC for each model was  
211 computed from 80,000 MCMC samples which were thinned from 125,000 samples  $\times$  8  
212 chains, so that the chains had ESS  $\sim$ 40,000.  
213 We then used the models selected by WBIC to estimate the parameters. As final  
214 samples, 10,000 thinned samples were recorded from 40,000 pre-thinned MCMC  
215 samples. It was ensured that the effective sample size (ESS) was at least 500 for each  
216 parameter.  
217 Using the estimated parameters, we computed the source-stratified risk of infection and  
218 the risk attributable to the introduction into the household (see the supplementary  
219 materials Section 2 for further details).

220

221 **Further model development**

222 When the parameters were estimated with the best model selected, we found that the  
223 estimates for  $c_{FC}$  and  $c_{OC}$  were very similar, which suggested that we might be able to  
224 equate these two parameters and further stratify the contacts between adults ( $c_{AA}$ ) with  
225 the degree of freedom earned. We tested some other contact intensity matrices,  
226 including

$$c_{kl} = \begin{cases} c_{CC} \text{ (Child – Child)} \\ c_{MC} \text{ (Mother – Child)} \\ c_{FM} \text{ (Father – Mother)} \\ c_{OO} \text{ (Other – Other)} \\ c_X \text{ (Cross generational)} \end{cases} \quad (7)$$

227 which gave the best performance in the end. Explored candidate models and selection  
228 results are detailed in the supplementary materials Section 2.

229

### 230 **Sensitivity analysis**

231 We performed sensitivity analysis to address potential biases in our dataset. We  
232 considered in our sensitivity analysis (i) ascertainment bias, (ii) different susceptibility  
233 in children, (iii) multiple counting of households and (iv) censoring of sibling cases.

234 The first two points are related to the assumptions in our models. Influenza can  
235 have a low reporting rate due to mild clinical presentation (including asymptomatic  
236 infections), and therefore some infectious individuals may not have been included in our  
237 dataset. The reporting rate of influenza is considered to be very high in primary school

238 students in Japan, who are often required to report influenza to their schools. On the  
239 other hand, the reporting rate of adults can be lower, as they may be less likely to seek  
240 medical treatment than children. A serosurvey conducted in Japan after the 2009/10  
241 H1N1 influenza pandemic suggested that while influenza in children were almost fully  
242 reported, the reporting rate of adults were relatively low (30-50%) (36).

243           Another possible difference between adults and children is susceptibility:  
244 adults may be less likely to be infected by the same amount of exposure due to the  
245 previous history of infections or stronger immune systems than children. Conversely,  
246 children may exhibit lower susceptibility if the vaccine uptake for them is higher than  
247 adults. The majority of household transmission studies from a systematic review (8)  
248 reported significant association between susceptibility and age (although this becomes  
249 the minority when limited to the studies with PCR-confirmed cases). Our baseline  
250 model assumes that transmissibility  $\beta$  is identical between individuals, but in reality  
251 transmissibility might depend on the age of the susceptibles.

252           The remaining points explored in sensitivity analysis are inherent limitations in  
253 our dataset. One of the limitations is that, because students in the same household  
254 responded to the questionnaire separately, households with multiple siblings may have  
255 been counted more than once. As this was an anonymous questionnaire, data obtained

256 from different students were not linked with each other even if they were from the same  
257 household. If there was more than one child in a household who was eligible for the  
258 study, the same household transmissions can appear multiple times in the dataset, which  
259 could modify the results. Lastly, because of the design of the questionnaire, the number  
260 of influenza cases in siblings may have been underreported. The questionnaire asked  
261 whether each type of individual in the same household had influenza during the season,  
262 and the respondents ticked if at least one individual of that type was infected since it  
263 was a yes-no question. Therefore, even if there was more than one case in the same type  
264 of individuals, the number was not reported and treated as a single case; that is, if a  
265 respondent has two older brothers, he/she only reports that “older brother had  
266 influenza”, and there was no distinction on the dataset whether it was only one or both  
267 of them.

268 Each potential source of bias was addressed by incorporating the data-generating  
269 process causing the bias into the model. Technical details of the sensitivity analysis can  
270 be found in the supplementary materials Section 3.

271

272 **Results**



273           We found that considerable heterogeneity existed in both the risk of external  
274 infection and the risk of within-household transmission (Table 3 and Figure 1). The best  
275 performing mathematical model suggested that children had a comparatively high risk  
276 of infection outside the household: 20% in the primary school students and 16% in their  
277 siblings, compared to only 1-3% in adults. Within-household contact patterns showed  
278 strong generational clustering. High contact intensities were observed within the same  
279 generation (between siblings, parents and grandparents), and the intensity of cross-  
280 generational contacts was less than half the intensity within the same generation.  
281 Contact between mothers and children was an exception to this, showing a higher  
282 intensity than between parents. The estimated contact intensity relative to that between  
283 parents (father-mother) was highest between other-other (1.97; CrI: 1.10-3.24), most of  
284 whom were grandparents in our data, followed by mother-child (1.16; CrI: 1.00-1.32)  
285 and child-child (1.04; 0.88-1.23). The model did not support a significant difference  
286 between parameter estimates for single and cohabiting parents.

287           The inferred networks of household transmission suggest that various contact  
288 patterns between household members exist in different household compositions. The  
289 contact intensity between individuals are shown in network graphs (Figures 3A-3C) for  
290 three selected characteristic household composition models, “nuclear family”: FM-2

291 (see Table 2 for the notation), (b) “many-siblings family”: FM-4, and (c) “three-  
292 generation family”: FM-2-2. Mothers served to bridge between the generations of  
293 children and parents; clusters of grandparents were relatively independent of other  
294 household members.

295 Overall risk of infection and the breakdown of infection source presented in  
296 Figures 3D–3F suggests that risk of infection in children was mostly from outside the  
297 household, whereas larger proportion of risk in adults was attributed to within-  
298 household transmission. Risk of within-household infection increased when more  
299 children were in the household (Figure 3E); however, the influence of additional  
300 members categorised as “others” (grandparents in most cases) was minimal, probably  
301 due to their low risk of external infection and contact intensity (Figure 3F). On the other  
302 hand, for grandparents in a typical three-generation household, the risk of infection from  
303 inside the household was twice the risk from outside.

304 Once influenza was brought into a household by a student, the conditional risk  
305 of infection in other members of the household became substantially higher; the  
306 implication of disease introduction into households can be seen in the simulated risk of  
307 infection after introduction (Figures 3G–3I). In “nuclear family” and “three-generation

308 family” models, the risk in adults increased by a factor of 2-3 if a primary school  
309 student in the family was infected.

310 The effective household contacts that each type of individual experiences are  
311 displayed in Figure 4, indicating the substantial variation in household contact patterns  
312 between individuals and between households. SITP typically ranged around 5-20%,  
313 depending on the contact pair and household composition. Reflecting the estimated  
314 value of  $\gamma=0.5$  (CrI: 0.3-0.7), the total amount of effective household contacts was  
315 greater in larger households, but the weight of each single contact (the effective contact  
316 corresponding to a contact with one individual in the household) decreased with  
317 household size. This is because the effective household contact  $\eta_{kl}$  that one experiences  
318 followed an “inverse square root law”, i.e.,  $\eta_{kl}$  is inversely proportional to the square  
319 root of the total amount of contact  $C_k$  ( $\eta_{kl} \propto C_k^{0.5}$ ; see Equation 4).

320 While Figure 4 summarises the heterogeneous within-household transmission  
321 patterns, one must note that the secondary transmission is conditional to infection in the  
322 primary case. When the contacts were weighted by the risk of external infection to  
323 visualise the source of primary and secondary infections for each individual, it can be  
324 seen that the children were responsible for the most of secondary transmissions within  
325 households (Figures 5): as children were more than five times likely to acquire

326 influenza from outside the household than adults, they were the most likely source of  
327 secondary transmission. As a consequence, the individual risk of infection was mostly  
328 determined the number of children in the household.

329           The sensitivity analysis suggested that the effective household contacts  
330 between children may have been lower than the baseline estimates under some  
331 assumptions (Figure S1). However, the overall trend did not change substantially. The  
332 importance of children introducing influenza into household remained unchanged  
333 throughout the sensitivity analysis.

334           The predicted and observed frequency of data compared in Figure S2 illustrate  
335 the goodness of fit of our model. The model prediction was highly consistent with the  
336 observed outcome patterns, suggesting our model successfully described the  
337 heterogeneous transmission patterns of influenza in households.

338

339

## 340 **Discussion**

341           We applied a household-based mathematical model to a large-scale influenza  
342 survey data including 10,000 primary school students and their families in Matsumoto  
343 city, Japan, 2014-15. With the dataset of an extensive sample size on morbidity and

344 familial roles of household members, the model captured heterogeneous transmission  
345 patterns in households in greater detail than previous household studies.

346           Our results are supportive of the common perception that influenza is brought  
347 into households by schoolchildren (37). With their high probability of contracting  
348 influenza outside the household, they were responsible for most secondary  
349 transmissions within households. Once they brought virus from outside the household,  
350 their mother and other siblings were exposed to a higher risk of within-household  
351 secondary transmission. The estimated breakdown of infection source showed that  
352 within-household transmission accounted for a large proportion of the overall risk in  
353 adults. The relative importance of within-household transmission was especially  
354 highlighted in grandparents in “three-generation” households. In a typical three-  
355 generation family composed of two children, two parents and two grandparents, the risk  
356 of infection in grandparents was tripled by within-household transmission. Besides, it  
357 must be noted that an infection of a grandparent is likely to be followed by that of  
358 another due to a high transmission risk between grandparents. These emphasise the  
359 importance of controlling school epidemic and household contagion, as the symptoms  
360 of influenza tends to be more severe in the elderly (37–39).

361           The results of the present study could have implications for household-level  
362 control measures. There are two steps in a household outbreak: introduction and within-  
363 household transmission. Due to the different risk patterns between the two steps, the  
364 focus of prevention measures should also change accordingly. At the pre-introduction  
365 stage when no one in the household is yet infected with influenza, the primary target is  
366 to prevent the first infection in the household from happening. Children, with the risk of  
367 external infection up to 20%, are most likely to be the first case in the household and  
368 thus should be prioritised at this stage. As the high risk of external infection is probably  
369 from schools (3), household members are advised to monitor the trend of school  
370 outbreaks and guide children to comply with daily precautions (40,41). Our results  
371 suggest that vaccinating children is an effective strategy not only because their risk of  
372 infection is high but also because they are responsible for a substantial fraction of  
373 within-household secondary infections. Especially for adults living with many children,  
374 protecting children from infection is as important as (or even more important in some  
375 cases) protecting themselves. If one of the household members contracts influenza  
376 despite the pre-introduction control effort, the primary target shifts to preventing further  
377 transmissions within the household. Household members are now exposed to an  
378 infectious person within the same household, which substantially elevates their risk. At

379 this post-introduction stage, preventing subsequent transmissions is important because  
380 every additional infection further increases the exposure. Our findings about household  
381 transmission patterns can be used to identify key individuals in the household network.  
382 For example, if the primary case is a child, the most probable secondary case is either  
383 the mother or another sibling. If the mother gets infected, that may be followed by a  
384 transmission to either the father or another child. Direct transmissions between children  
385 and father/grandparent may be relatively rare. Grandparents are suggested to be at  
386 comparatively low risk from other household members. However, their contacts with  
387 each other are closer than any other pair of household members, which warrants  
388 attention provided the high disease burden of influenza in the elderly.

389         To our best knowledge, the present study first reported a parametric  
390 relationship between within-household influenza transmission and household  
391 composition with high precision. With a detailed dataset consisting of up to 10,000  
392 households, the present study was able to employ a highly flexible modelling  
393 framework to explore previously used modelling assumptions in great detail. A decrease  
394 of the per-person risk of within-household infections with household size has been  
395 observed in previous studies (8); our model selection supported that this reduced effect  
396 of household contact is better characterised as a function of the total amount of contact

397 experienced by an individual ( $C_k$ ) rather than the household size ( $N$ ), and that the  
398 relationship follows an inverse square root law. Previous modelling studies used  
399 different frameworks to study the relationship between SITP and household  
400 composition. Cauchemez et al. (2014) (14) selected the frequency-dependent mixing  
401 assumption (SITP inversely proportional to  $N$ ) over the density-dependent mixing (SITP  
402 independent of  $N$ ). Many similar studies were also supportive of the frequency-  
403 dependent mixing assumption (13,18,21), while Azman et al. (2013) reported an  
404 increased transmission rate in larger household (SITP proportional to  $N^{0.7}$ ; although not  
405 conclusive due to the limited sample size). One of the strengths of our results is that not  
406 only did we propose a better alternative measure to scale SITP than household size, we  
407 also differentiated the model from both density- and frequency dependent models with a  
408 sufficient support. The best model suggested that within-household transmission  
409 patterns lies half-way between the two extremes of density- and frequency-dependent  
410 models (we call this the semi-density-dependent model as the total effective contact  
411 experienced by an individual is proportional to the total contact intensity to the power of  
412 0.5). Although a similar approach (without incorporating heterogeneous contact  
413 patterns) was employed in (18), where the authors estimated the STIP proportional to  
414  $N^{1.2}$ , their CrI was too wide (0.13-2.3) to be conclusive. The large-scale dataset enabled



415 us to obtain a narrower CrI (0.30-0.72) that distinguished the model with significance  
416 from the density- and frequency-dependent models. In the semi-density-dependent  
417 model, the total amount of effective contact increases in larger household despite the  
418 reduced importance of each contact (Figure 4). Therefore, if the risk of external  
419 infection is similar between household members, having many household members is a  
420 risk factor (which is not usually the case in the frequency-dependent model) because the  
421 effect of reduced SITP is outweighed by the increased number of household members  
422 who potentially bring infection into the household. Although such effect was not clearly  
423 visible in the present study due to the almost exclusive primary infections in children  
424 (Figure 5), more distinct characteristics may be seen in other epidemic settings with the  
425 semi-density dependent model.

426 Multiple limitations in the present study must be acknowledged. Firstly, the  
427 case definition in the dataset was not very strict. The data was collected by self-written  
428 questionnaires and it was impossible to validate their response. In the dataset, all student  
429 cases were reported to be with a clinical diagnosis, and more than 95% of diagnoses  
430 were based on RDks (42). Considering that primary school students in Japan are highly  
431 motivated to visit medical institutions to obtain a leave of absence from school, we  
432 believe that our data was able to capture influenza incidence in primary schools at high

433 accuracy. However, it is not clear if the same applies to their household members;  
434 diagnosis was not explicitly required for household members on the question sheet,  
435 although the term “influenza” rather than “influenza-like illness” was used. Moreover,  
436 subclinical infections may have been present both in children and adults. Because of  
437 this, we considered underreporting in the sensitivity analysis, leaving the main  
438 conclusions unaltered. Secondly, our model formulation is only one possible candidate  
439 for parameterising within-household transmission patterns. “Contact” in our model was  
440 merely a hypothetical quantity and may not be directly related to actual physical or  
441 social contacts. We also had to use a relatively simple contact pattern matrix for  
442 successful parameter estimation. Although our model successfully explained the current  
443 data incorporating in an interpretable manner, further development may be sought in the  
444 future, including empirical characterisations of household contact patterns which is  
445 currently lacking. A recent study have suggested the possible age-dependency in the  
446 contact frequency between siblings (6), but the age of household members were not  
447 available in the current dataset. More informative dataset and understanding of age-  
448 dependent household contact patterns will yield further clarification on this point.  
449 Furthermore, one must be aware that our analysis based on a unique study population,  
450 i.e., households with at least one primary school student in Matsumoto city, may not be

451 overgeneralized. Extrapolating our household transmission model to household  
452 compositions not included in the dataset, e.g., household with no children, may be  
453 unreliable. Thirdly, the present study radically simplified the risk factors of individuals.  
454 Covariates other than familial roles and household compositions, e.g., comorbidities,  
455 vaccination history, previous exposures or habits of personal hygiene, were not  
456 considered. The risk of external infection in children was estimated as a single value,  
457 which may potentially vary between classes, grades and schools. Overdispersion in  
458 infectiousness as addressed in (13,43,44) was also assumed to be negligible.  
459 Nonetheless, it is of note that the model had a fairly good performance despite  
460 considerable simplification.

461         Although more follow-up studies that supplement our findings are to be  
462 awaited, we believe that the present study has presented useful insights on the  
463 household-level dynamics of influenza. Understanding of the household-specific contact  
464 patterns will help us illustrate how influenza spreads across multiple social settings and  
465 facilitate individual and political decisions on disease control accounting for household-  
466 specific characteristics.

467

468 **Author contributions**

469 AE: conceptualisation, methodology, software, formal analysis, visualisation, writing

470 (original draft preparation)

471 MU: data curation, writing (review & editing)

472 AK: methodology, supervision, writing (review & editing)

473 SF: methodology, supervision, writing (review & editing)

474

## 475 **Tables**

476 Table 1. The number of individuals and influenza cases in each type

| Individual type |         | Counts | Cases | Attack ratio (%) |
|-----------------|---------|--------|-------|------------------|
| Student         | Overall | 10,410 | 2,137 | 20.5             |
|                 | Male    | 5,311  | 1,132 | 21.3             |
|                 | Female  | 5,099  | 1,005 | 19.7             |
|                 | Grade 1 | 1,831  | 406   | 22.2             |
|                 | 2       | 1,773  | 363   | 20.5             |
|                 | 3       | 1,731  | 342   | 19.8             |
|                 | 4       | 1,717  | 375   | 21.8             |
|                 | 5       | 1,674  | 322   | 19.2             |
|                 | 6       | 1,684  | 329   | 19.5             |
| Father          |         | 9,201  | 629   | 6.8              |
| Mother          |         | 10,260 | 866   | 8.4              |
| Sibling         |         | 12,632 | 2,320 | 18.4             |
| Other           |         | 4,356  | 191   | 4.4              |

477 \* The number of respondents and cases for “Father”, “Mother”, “Sibling” and “Other”  
478 is obtained from the response to the questionnaire and may be redundant due to the  
479 inclusion of multiple students from the same household.

480

481 Table 2. Frequency distribution table for compositions of households included in the  
482 retrospective data

| Order | Composition | # of households | Order | Composition | # of households |
|-------|-------------|-----------------|-------|-------------|-----------------|
| 1     | FM-2        | 3,915           | 11    | M-3         | 160             |
| 2     | FM-3        | 1,971           | 12    | FM-1-2      | 134             |
| 3     | FM-1        | 899             | 13    | FM-1-1      | 97              |
| 4     | FM-2-2      | 606             | 14    | M-1-2       | 86              |
| 5     | M-2         | 429             | 15    | M-2-2       | 80              |
| 6     | FM-2-1      | 415             | 16    | FM-2-3      | 70              |
| 7     | FM-3-2      | 297             | 17    | FM-3-3      | 57              |
| 8     | FM-4        | 250             | 18    | FM-4-2      | 55              |
| 9     | FM-3-1      | 232             | 19    | M-1-1       | 43              |
| 10    | M-1         | 205             | 20    | M-2-1       | 39              |
|       |             |                 |       | Subtotal    | 10,040 (95.7%)  |

483 Only 20 most frequent compositions are shown, accounting for 95.7% of the total  
484 10,486 responses. Household compositions are denoted in the following manner.

485 FM: households with both father and mother; M: households with only mother; The first  
 486 number: the total number of siblings in the household; The second number (where  
 487 applicable): the number of other members (mostly grandparents) in the household.  
 488

489 Table 3. Parameter estimates by the best model.

| Parameter                         | Prior                        | Estimate (95% CrI)  |                     |
|-----------------------------------|------------------------------|---------------------|---------------------|
| External risk ( $\varepsilon_k$ ) | Student                      | 0.197 (0.188-0.207) |                     |
|                                   | Sibling                      | 0.161 (0.153-0.169) |                     |
|                                   | Mother                       | 1-LogUnif(0,1)*     | 0.035 (0.030-0.040) |
|                                   | Father                       |                     | 0.038 (0.033-0.043) |
|                                   | Other                        |                     | 0.013 (0.009-0.017) |
| Contact intensity ( $c_{kl}$ )    | Child-Child                  |                     | 1.04 (0.88-1.23)    |
|                                   | Mother-Child                 |                     | 1.16 (1.00-1.32)    |
|                                   | Father-Mother                | Unif(0, $\infty$ )  | 1 (0.748-1.282)     |
|                                   | Other-Other                  |                     | 1.97 (1.10-3.24)    |
|                                   | Cross generational           |                     | 0.43 (0.35-0.52)    |
| Transmissibility ( $\beta$ )      | (not sampled by MCMC)        | 0.20 (0.16-0.24)    |                     |
| Exponent parameter ( $\gamma$ )   | Uniform( $-\infty, \infty$ ) | 0.51 (0.33-0.69)    |                     |

490 \* Cumulative force of infection is uniformly distributed.

491

492 **Figures**

493

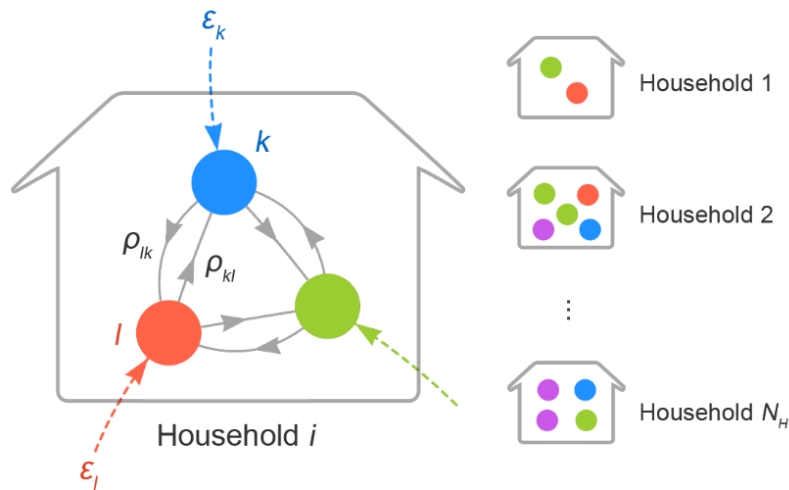

494

495 Figure 1. A schematic illustration of household chain-binomial model.

496 Nodes in different colours corresponds to different types of individuals (e.g., father,

497 sibling, etc.). Transmission patterns are illustrated taking household  $i$  as an example.

498 Coloured dotted edges represent the risk of external infection  $\epsilon$  to each individual. Solid

499 grey edges denote person-to-person transmission risk (PTR) from one type of person to

500 another. PTR from type  $l$  to  $k$  is given as  $\rho_{kl}$ , which refers to the risk of transmission

501 given that the individual of type  $l$  is infectious. Households have different compositions

502 and  $\rho_{kl}$  may also vary according to the composition. On the other hand,  $\epsilon$  is the risk from

503 outside the household and thus assumed to be identical across households.

504

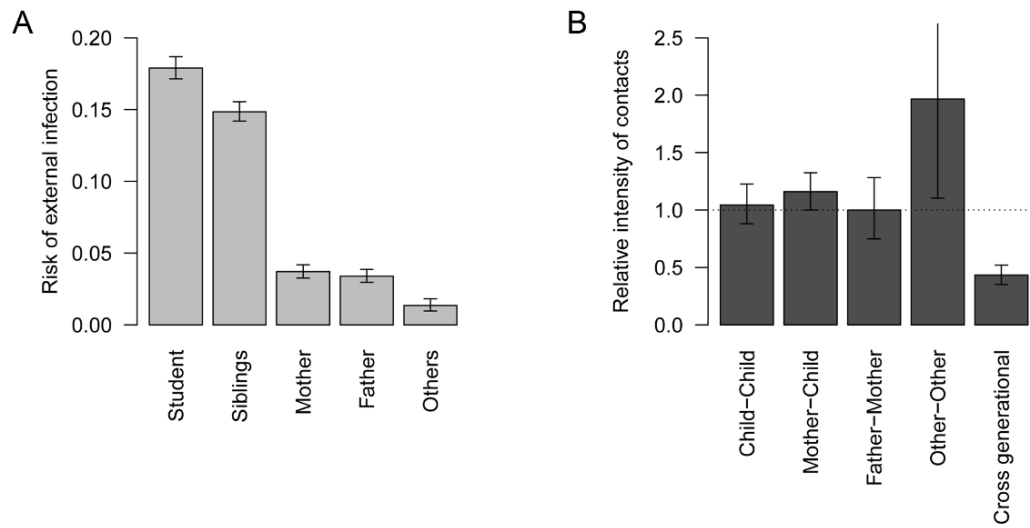

505

506 Figure 2. Estimated risk of external infection and relative intensity of within-household

507 contact. (A) Estimated risk of external infection for each type of individual. (B)

508 Estimated relative intensity of within-household contact. Values are scaled so that the

509 median of contact intensity between adults is 1 (horizontal dotted line). Whiskers

510 indicate 95% credible intervals (CrI).

511



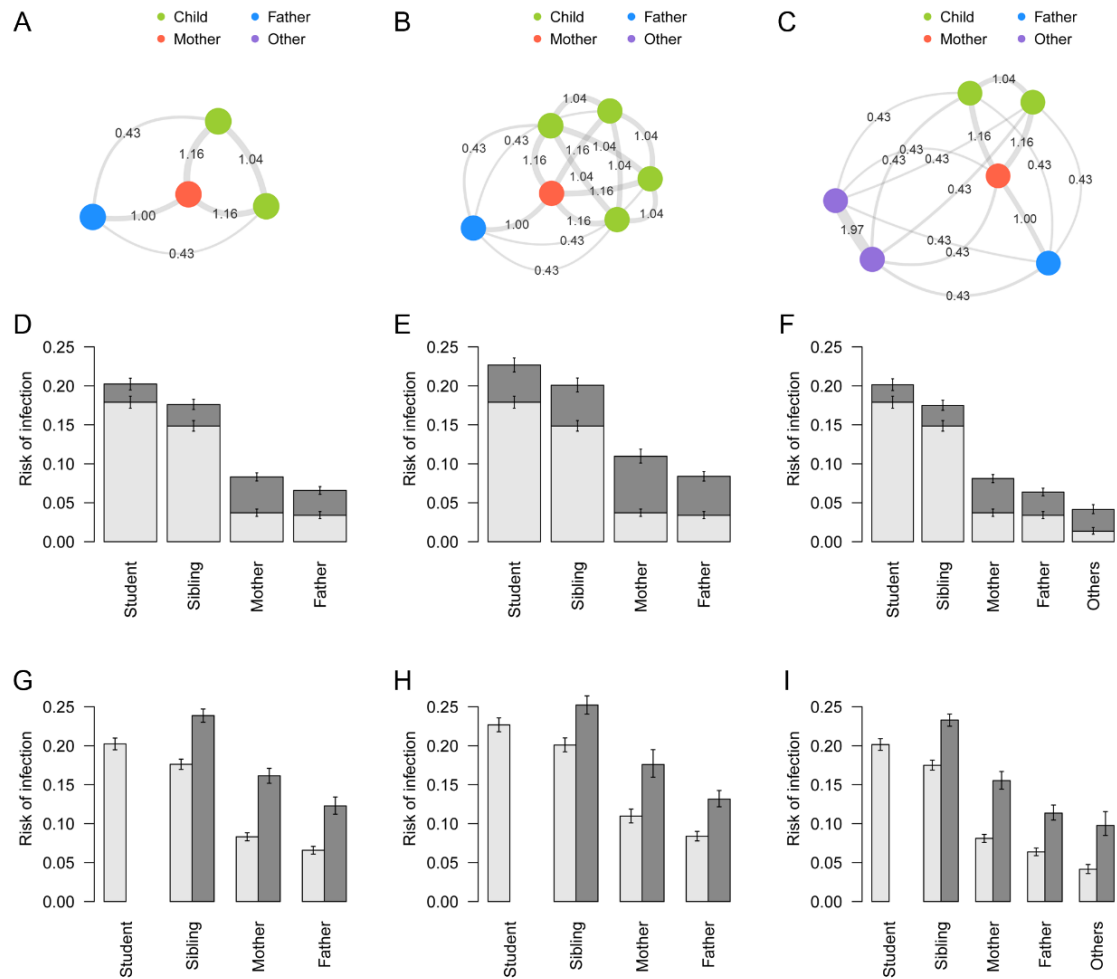

512

513 Figure 3. Contact patterns and risk of infection in specific household compositions.

514 (A)-(C) Network graphs showing contact intensity between individuals for different

515 household compositions: (A) “nuclear family”, (B) “many-siblings family”, (C) “three-

516 generation family”. Node colours represent the type of individuals. Edges denote the

517 relative intensity of contact ( $c_{kl}$ ) between individuals.

518 (D)-(F) Risk of infection in households of different compositions stratified by source.

519 Light grey: risk of infection from outside the household; dark grey: risk of infection

520 from within the household. Whiskers indicate the 95% CrI.

521 (G)-(I) Unconditional risk of infection and conditional risk given introduction of

522 infection into a household. Light grey: overall risk of infection for each individual in the

523 household; dark grey: risk of overall infection conditional that a student is infected

524 outside and introduces infection into the household. Infection of the student is given and

525 thus the conditional risk for the student is not shown. Whiskers indicate the 95% CrI.

526

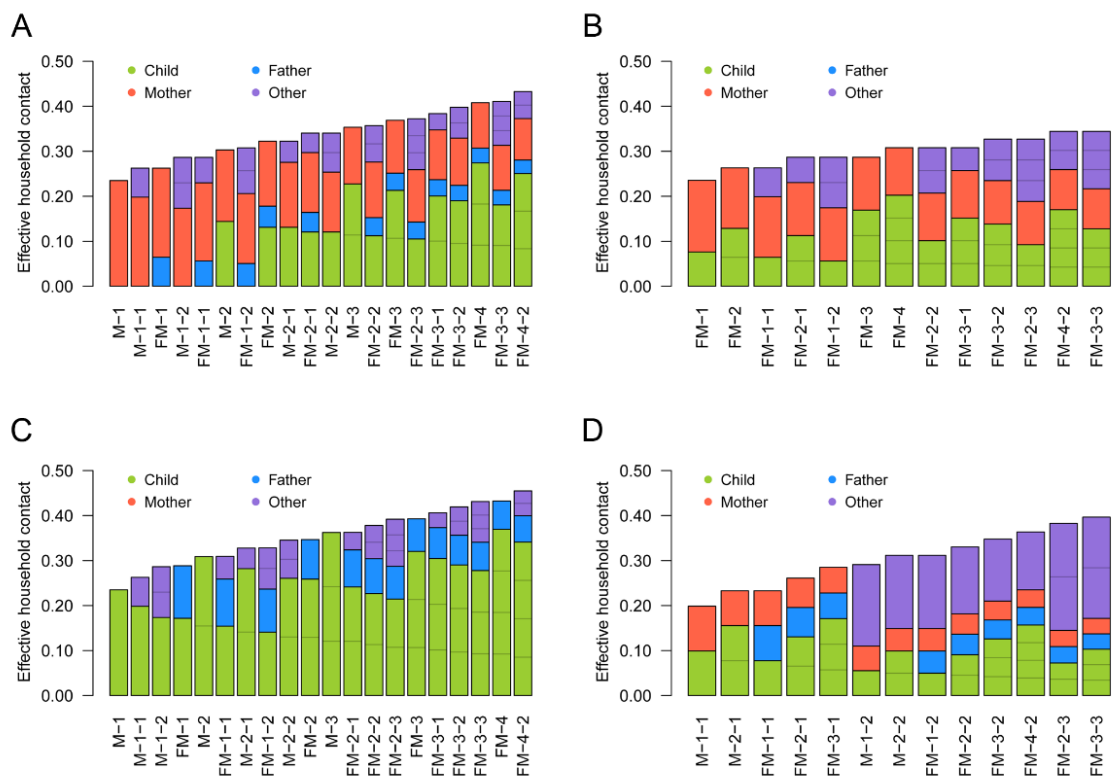

527

528 Figure 4. The effective amount of contacts experienced by individuals ( $R_{kl}$ ) in different

529 household compositions.

530 (A) Child; (B) Father; (C) Mother; (D) Other. The coloured compartments denote the  
531 breakdown of effective contacts allocated to each individual in the household, which  
532 corresponds to SITP given that individual is infectious.  
533

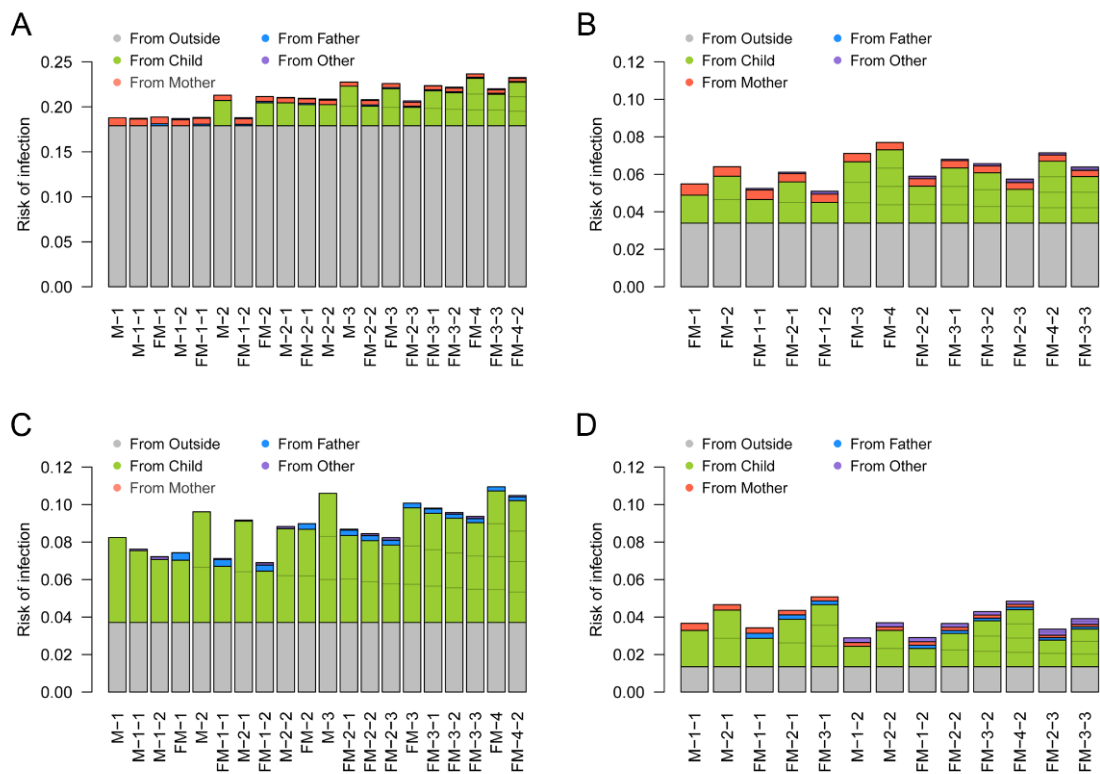

534  
535 Figure 5. The risk of primary/secondary infection to individuals in different household  
536 compositions and its source.  
537 (A) Child; (B) Father; (C) Mother; (D) Other. The coloured compartments denote the  
538 breakdown of sources. Household compositions are displayed in the same order as  
539 Figure 4. The risk of primary infection in children was set to be 16.4%, the average

540 between those of “students” and “siblings”. Note that the scale of the y axis in (E) is  
541 different from the other 3 panels.

542

## 543 **References**

- 544 1. le Polain de Waroux O, Flasche S, Kucharski AJ, Langendorf C, Ndazima D, Mwanga-  
545 Amumpaire J, et al. Identifying human encounters that shape the transmission of Streptococcus  
546 pneumoniae and other acute respiratory infections. *Epidemics*. 2018;
- 547 2. Christakis NA, Fowler JH. Social network sensors for early detection of contagious outbreaks.  
548 *PLoS One*. 2010;
- 549 3. Ackerman E, Elveback LR. *Simulation of infectious disease epidemics*. Springfield, Ill.: C. C.  
550 Thomas; 1984.
- 551 4. Ferguson NM, Cummings DAT, Fraser C, Cajka JC, Cooley PC, Burke DS. Strategies for  
552 mitigating an influenza pandemic. *Nature*. 2006;
- 553 5. Mossong J, Hens N, Jit M, Beutels P, Auranen K, Mikolajczyk R, et al. Social contacts and  
554 mixing patterns relevant to the spread of infectious diseases. *PLoS Med*. 2008;

- 555 6. Goeyvaerts N, Santermans E, Potter G, Torneri A, Kerckhove K Van, Willem L, et al. Household  
556 members do not contact each other at random: implications for infectious disease modelling. Proc  
557 R Soc B Biol Sci. 2018;285(1893):20182201.
- 558 7. Ibuka Y, Ohkusa Y, Sugawara T, Chapman GB, Yamin D, Atkins KE, et al. Social contacts,  
559 vaccination decisions and influenza in Japan. J Epidemiol Community Health. 2016;
- 560 8. Tsang TK, Lau LLH, Cauchemez S, Cowling BJ. Household Transmission of Influenza Virus.  
561 Trends Microbiol. 2016;24(2):123–33.
- 562 9. Lau LLH, Nishiura H, Kelly H, Ip DKM, Leung GM, Cowling BJ. Household transmission of  
563 2009 pandemic influenza A (H1N1): a systematic review and meta-analysis. Epidemiology. 2012;
- 564 10. Longini IM, Koopman JS. Household and community transmission parameters from final  
565 distributions of infections in households. Biometrics. 1982;38(1):115–26.
- 566 11. Becker NG, Britton T. Statistical studies of infectious disease incidence. J R Stat Soc B.  
567 1999;61(2):287–307.
- 568 12. Ball F, Neal P. A general model for stochastic SIR epidemics with two levels of mixing. Math  
569 Biosci. 2002;180:73–102.

- 570 13. House T, Inglis N, Ross J V., Wilson F, Suleman S, Edeghere O, et al. Estimation of outbreak  
571 severity and transmissibility: Influenza A(H1N1)pdm09 in households. BMC Med.  
572 2012;10(1):117.
- 573 14. Cauchemez S, Ferguson NM, Fox A, Mai LQ, Thanh LT, Thai PQ, et al. Determinants of  
574 Influenza Transmission in South East Asia: Insights from a Household Cohort Study in Vietnam.  
575 PLoS Pathog. 2014;10(8):2–9.
- 576 15. O’Neill PD, Balding DJ, Becker NG, Eerola M, Mollison D. Analyses of infectious disease data  
577 from household outbreaks by Markov chain Monte Carlo methods. J R Stat Soc Ser C-Applied  
578 Stat. 2000;49(4):517–42.
- 579 16. Wardell R, Prem K, Cowling BJ, Cook AR. The role of symptomatic presentation in influenza A  
580 transmission risk. Epidemiol Infect. 2017;
- 581 17. Azman AS, Stark JH, Althouse BM, Vukotich CJ, Stebbins S, Burke DS, et al. Household  
582 transmission of influenza A and B in a school-based study of non-pharmaceutical interventions.  
583 Epidemics. 2013;
- 584 18. Cauchemez S, Bhattarai A, Marchbanks TL, Fagan RP, Ostroff S, Ferguson NM, et al. Role of  
585 social networks in shaping disease transmission during a community outbreak of 2009 H1N1  
586 pandemic influenza. Proc Natl Acad Sci. 2011;108(7):2825–30.

- 587 19. Cauchemez S, Donnelly CA, Reed C, Ghani AC, Fraser C, Kent CK, et al. Household  
588 transmission of 2009 pandemic influenza A (H1N1) virus in the United States. *N Engl J Med.*  
589 2009;
- 590 20. Tsang TK, Cauchemez S, Perera RAPM, Freeman G, Fang VJ, Ip DKM, et al. Association  
591 between antibody titers and protection against influenza virus infection within households. *J*  
592 *Infect Dis.* 2014;
- 593 21. Cauchemez S, Ferguson NM, Wachtel C, Tegnell A, Saour G, Duncan B, et al. Closure of schools  
594 during an influenza pandemic. *The Lancet Infectious Diseases.* 2009.
- 595 22. Thai PQ, Mai LQ, Welkers MRA, Hang NLK, Thanh LT, Dung VTV, et al. Pandemic H1N1  
596 virus transmission and shedding dynamics in index case households of a prospective Vietnamese  
597 cohort. *J Infect.* 2014;
- 598 23. Wu JT, Riley S, Fraser C, Leung GM. Reducing the impact of the next influenza pandemic using  
599 household-based public health interventions. *PLoS Med.* 2006;
- 600 24. Budge PJ, Griffin MR, Edwards KM, Williams J V., Verastegui H, Hartinger SM, et al. Impact of  
601 home environment interventions on the risk of influenza-associated ARI in Andean Children:  
602 Observations from a prospective household-based cohort study. *PLoS One.* 2014;

- 603 25. Yeung MPS, Lam FLY, Coker R. Factors associated with the uptake of seasonal influenza  
604 vaccination in adults: A systematic review. *Journal of Public Health (United Kingdom)*. 2016.
- 605 26. Wu S, Su J, Yang P, Zhang H, Li H, Chu Y, et al. Factors associated with the uptake of seasonal  
606 influenza vaccination in older and younger adults: A large, population-based survey in Beijing,  
607 China. *BMJ Open*. 2017.
- 608 27. Uchida M, Kaneko M, Hidaka Y, Yamamoto H, Honda T, Takeuchi S, et al. Effectiveness of  
609 vaccination and wearing masks on seasonal influenza in Matsumoto City, Japan, in the 2014/2015  
610 season: An observational study among all elementary schoolchildren. *Prev Med Reports*.  
611 2017;5:86–91.
- 612 28. Chartrand C, Leeflang MMG, Minion J, Brewer T, Pai M. Accuracy of rapid influenza diagnostic  
613 tests: A meta-analysis. *Annals of Internal Medicine*. 2012.
- 614 29. Bruning AHL, Leeflang MMG, Vos JMBW, Spijker R, de Jong MD, Wolthers KC, et al. Rapid  
615 Tests for Influenza, Respiratory Syncytial Virus, and Other Respiratory Viruses: A Systematic  
616 Review and Meta-analysis. *Clin Infect Dis*. 2017;
- 617 30. Yamazaki M, Mitamura K, Ichikawa M, Kimura K, Komiyama O, Shimizu H, et al. [Evaluation  
618 of flow-through immunoassay for rapid detection of influenza A and B viruses]. *Kansenshogaku  
619 Zasshi*. 2004;



- 620 31. Hara M, Takao S, Fukuda S, Shimazu Y, Miyazaki K. [Comparison of three rapid diagnostic kits  
621 using immunochromatography for detection of influenza A viruses]. *Kansenshogaku Zasshi*.  
622 2004;
- 623 32. Hara M, Sadamasu K, Takao S, Shinkai T, Kai A, Fukuda S, et al. [Evaluation of  
624 immunochromatography test for rapid detection of influenza A and B viruses using real-time  
625 PCR]. *Kansenshogaku Zasshi*. 2006;
- 626 33. Longini IM, Koopman JS, Haber M, Cotsonis GA. Statistical inference for infectious diseases:  
627 Risk-specific household and community transmission parameters. *Am J Epidemiol*. 1988;
- 628 34. Begon M, Bennett M, Bowers RG, French NP, Hazel SM, Turner J. A clarification of  
629 transmission terms in host-microparasite models: Numbers, densities and areas. *Epidemiol Infect*.  
630 2002;
- 631 35. Watanabe S. A Widely Applicable Bayesian Information Criterion. 2013;14:867–97.
- 632 36. Mizumoto K, Yamamoto T, Nishiura H. Age-dependent estimates of the epidemiological impact  
633 of pandemic influenza (H1N1-2009) in Japan. *Comput Math Methods Med*. 2013;
- 634 37. Glezen WP. Emerging infections: Pandemic influenza. *Epidemiologic Reviews*. 1996.
- 635 38. Thompson WW, Shay DK, Weintraub E, Brammer L, Bridges CB, Cox NJ, et al. Influenza-  
636 associated hospitalizations in the United States. *J Am Med Assoc*. 2004;

- 637 39. Schanzer DL, Tam TWS, Langley JM, Winchester BT. Influenza-attributable deaths, Canada  
638 1990-1999. *Epidemiol Infect.* 2007;
- 639 40. Jefferson T, Foxlee R, Del Mar C, Dooley L, Ferroni E, Hewak B, et al. Physical interventions to  
640 interrupt or reduce the spread of respiratory viruses: Systematic review. *BMJ.* 2008;
- 641 41. Aiello AE, Murray GF, Perez V, Coulborn RM, Davis BM, Uddin M, et al. Mask Use, Hand  
642 Hygiene, and Seasonal Influenza - Like Illness among Young Adults: A Randomized  
643 Intervention Trial. *J Infect Dis.* 2010;
- 644 42. Uchida M, Kaneko M, Hidaka Y, Yamamoto H, Honda T, Takeuchi S, et al. Prospective  
645 epidemiological evaluation of seasonal influenza in all elementary schoolchildren in Matsumoto  
646 city, Japan, in 2014/2015. *Jpn J Infect Dis.* 2017;
- 647 43. Ball F. A unified approach to the distribution of total size and total area under the trajectory of  
648 infectives in epidemic models. *Adv Appl Probab.* 1986;
- 649 44. Van Boven M, Koopmans M, Van Beest Holle MDR, Meijer A, Klinkenberg D, Donnelly CA, et  
650 al. Detecting emerging transmissibility of avian influenza virus in human households. *PLoS*  
651 *Comput Biol.* 2007;3(7):1394–402.
- 652
